## REVIEW

# Surprising simplicities and syntheses in limbless self-propulsion in sand

Henry C. Astley<sup>\*1</sup>, Joseph R. Mendelson, III<sup>2,3</sup>, Jin Dai<sup>4</sup>, Chaohui Gong<sup>4</sup>, Baxi Chong<sup>5</sup>, Jennifer M. Rieser<sup>5</sup>, Perrin E. Schiebel<sup>5</sup>, Sarah S. Sharpe<sup>6</sup>, Ross L. Hatton<sup>7</sup>, Howie Choset<sup>4</sup> and Daniel I. Goldman<sup>5</sup>

## ABSTRACT

Animals moving on and in fluids and solids move their bodies in diverse ways to generate propulsion and lift forces. In fluids, animals can wiggle, stroke, paddle or slap, whereas on hard frictional terrain, animals largely engage their appendages with the substrate to avoid slip. Granular substrates, such as desert sand, can display complex responses to animal interactions. This complexity has led to locomotor strategies that make use of fluid-like or solid-like features of this substrate, or combinations of the two. Here, we use examples from our work to demonstrate the diverse array of methods used and insights gained in the study of both surface and subsurface limbless locomotion in these habitats. Counterintuitively, these seemingly complex granular environments offer certain experimental, theoretical, robotic and computational advantages for studying terrestrial movement, with the potential for providing broad insights into morphology and locomotor control in fluids and solids, including neuromechanical control templates and morphological and behavioral evolution. In particular, granular media provide an excellent testbed for a locomotion framework called geometric mechanics, which was introduced by particle physicists and control engineers in the last century, and which allows quantitative analysis of alternative locomotor patterns and morphology to test for control templates, optimality and evolutionary alternatives. Thus, we posit that insights gained from movement in granular environments can be translated into principles that have broader applications across taxa, habitats and movement patterns, including those at microscopic scales.

**KEY WORDS:** Biomechanics, Geometric mechanics, Granular media, Locomotion, Squamates

## Introduction

In recent years, the study of biomechanics has helped disentangle the roles of control and mechanics during locomotion in natural environments. During animal locomotion, coupled nervous, muscular and mechanical systems produce movements that generate reaction forces to move the body forward. Movement, however, cannot proceed without appropriate environmental interactions. Even common environments like hard ground, water

and air display complex interactions with moving animals. For example, analysis of legged locomotion on flat rigid terrain can be complex as a result of impulsive and repeated collisions (e.g. Collins et al., 2005; Holmes et al., 2006). Fluid interactions have been extensively studied (Vogel, 1994; Lauder, 2010), but despite possessing the partial differential equations (PDEs) that describe such interactions (the Navier–Stokes equations), the complexity of fluid flow around deforming bodies makes it difficult to gain a fundamental understanding of locomotion in these environments (Tobalske, 2007; Tytell et al., 2010; Waldrop and Miller, 2015; Gemmell et al., 2016; Cohen et al., 2018; Wise et al., 2018).

## Granular media

In environments composed of granular media (see Glossary), such as sand and loose soil, the situation is seemingly more complicated. Granular media comprise numerous discrete particles which, depending upon loading conditions, can undergo jamming (see Glossary) via internal friction and behave as a solid, or they may slip past each other to yield and flow like a fluid (Gravish et al., 2010). Granular media discussed here will be defined as collections of approximately spherical particles that interact via repulsive contact forces (friction and repulsion). Until recently, we have not had equations for granular materials that describe these fluid- and solid-like interactions under all conditions (see Askari and Kamrin, 2016); however, many insights have been gained through hundreds of years of study (Coulomb, 1776; Schofield and Wroth, 1968; Savage, 1984; Andreotti et al., 2013). For example, provided that stresses do not exceed critical ‘yield’ stresses (see Glossary), granular media can support loads without significant deformation. However, if yield stresses are exceeded, the materials can enter a ‘frictional fluid’ state (see Glossary) that is peculiar compared with true fluids. For example, even at relatively high speeds of movement through granular media, reaction forces are insensitive to rate of movement (Geng and Behringer, 2005; Maladen et al., 2009), in contrast to the strong dependence upon velocity in fluids. This insensitivity is a consequence of the dominance and rate insensitivity of Coulomb friction (see Glossary) between particles and between particle and body elements (Maladen et al., 2009). Further, forces depend on compaction; increasing the packing fraction (see Glossary) by a few percent can lead to a doubling of resistance forces.

Both solid- and fluid-like responses can be important to understand the control of locomotion on granular materials. For example, because the transitions between these two responses are sensitive to the kinematics of the intruding object, animals may modify their movements to promote solidification or fluidization of the medium to improve their locomotor performance (Mazouchova et al., 2010; Marvi et al., 2014). Further, the high frictional forces in sand and the ability of the material to ‘remember’ disturbances (e.g. footprints and tracks) impose additional demands on locomotion.

<sup>1</sup>Biomimicry Research & Innovation Center, Departments of Biology & Polymer Science, University of Akron, 235 Carroll Street, Akron, OH 44325-3908, USA. <sup>2</sup>Zoo Atlanta, Atlanta, GA 30315, USA. <sup>3</sup>Department of Biology, Georgia Institute of Technology, Atlanta, GA 30332, USA. <sup>4</sup>Robotics Institute, Carnegie Mellon University, Pittsburgh, PA 15213, USA. <sup>5</sup>Department of Physics, Georgia Institute of Technology, Atlanta, GA 30332, USA. <sup>6</sup>Exponent Inc., Phoenix, AZ 85027, USA. <sup>7</sup>Collaborative Robotics and Intelligent Systems Institute, Oregon State University, Corvallis, OR 97331-6001, USA.

\*Author for correspondence (hastley@uakron.edu)

© H.C.A., 0000-0003-0136-1433; D.I.G., 0000-0002-6954-9857

**Glossary****Constraint curvature function (CCF)**

Diagrams which enable visualization and rapid calculation of performance for different cyclic patterns of 'self-deformation' (like lateral undulation wave shapes).

**Coulomb friction**

A model for friction between dry surfaces, in which the frictional force is proportional to the normal force between the surfaces and independent of surface area or speed.

**Fluidization**

The process of forcing a fluid flow through a granular media, which will then behave as a fluid until the flow drops below a minimum speed.

**Frictional fluid**

When flowing, granular media behaves as a frictional fluid with some similarities to low Reynolds number ( $Re$ ) flows. In low  $Re$  flow, the viscous forces overwhelm inertia effects, whereas in frictional fluids, the frictional forces between particles overwhelm inertial effects. This allows the use of mathematical tools and concepts from analysis of low  $Re$  locomotion to be applied to granular media.

**Granular media**

A substrate composed of many particles in contact with each other. These particles may interact via friction or, in wet systems, capillary adhesion.

**Jamming**

A phenomenon in which the friction between particles of granular media reaches equilibrium with the applied force, causing deformation of the media to cease.

**Neuromechanical template**

A simplified model describing the fundamental dynamics and motion of an animal during locomotion, which serves as a target for control; the spring-loaded inverted pendulum (SLIP) model of walking is a neuromechanical template.

**Packing fraction**

The fraction of a volume occupied by granular particles. Granular media in a close-packed state will have many particles in a given volume and many inter-particle contacts, whereas a loose-packed state will have fewer particles and contacts. Small changes in packing fraction can have large consequences for values such as yield stress.

**Rheology**

The study of flowing matter, including fluids, plastically deforming solids and granular media.

**Yield stress**

The force per unit area necessary to overcome frictional forces in the granular media and cause yielding deformation.

These disturbed regions can have lower yield stress; thus, an animal that interacts with disturbed media may have reduced displacement, setting off a feedback cycle of performance decay that leaves it stuck in its own tracks (Mazouchova et al., 2013; McInroe et al., 2016; Schiebel et al., 2019 preprint).

**Why study limbless locomotion in dry granular media?**

Despite the challenges associated with the physics of granular environments, many species move on or within these substrates. These include legged (Li et al., 2012; Qian et al., 2015), flipped (Mazouchova et al., 2013; McInroe et al., 2016) and functionally limbless species (Maladen et al., 2009; Sharpe et al., 2015a; Marvi et al., 2014; Astley et al., 2015). In this Review we focus on situations in which experimentation, theory and computation have been integrated to analyze a particular form of locomotion: the use of waves of body undulation to propel the animal on and within dry granular media. Numerous terrestrial vertebrates have elongate, limbless (or functionally limbless) body plans, with most examples from squamate reptiles (Gans, 1975). Functional limblessness has evolved multiple times (Wiens et al., 2006), in deserts and other

environments, and is associated with diverse locomotor behaviors (Gray, 1946; Gray and Lissmann, 1950; Jayne, 1986). For example, lateral undulation ('slithering') and sidewinding (gaits we will focus on in this Review) both employ posteriorly propagating waves of lateral bending, and sidewinding adds an additional vertical wave of lifting/lowering; lateral undulation and sidewinding are mostly used to move through cluttered substrates or environments dominated by open, granular substrates, respectively (Gray, 1946; Gray and Lissmann, 1950; Jayne, 1986). These behaviors are dominated by frictional forces, with minimal inertial effects (Hu et al., 2009).

Surprisingly, limbless locomotion on granular media provides opportunities to gain insights into these substrates and terrestrial locomotion more broadly; a combination of factors creates a tractable system for examining fundamental concepts in locomotion, such as neuromechanical phase lags, control 'templates' (Full and Koditschek, 1999) and morphological and behavioral adaptations. First, dry granular substrates can pose substantial challenges to such locomotors, and thus may drive behavioral or morphological adaptations (Marvi et al., 2014; Tingle et al., 2017). However, unlike more complex terrestrial environments, the granular natural habitat is often homogeneous and obstacles are sparse, making these environments particularly amenable to the creation of laboratory model systems. Tools (Fig. 1A) allowing repeatable and standardized preparation of granular media into ecologically relevant initial conditions are relatively straightforward to develop (in contrast, studies of wet soils and muds often rely on substrate mimics; Dorgan et al., 2005). The rheology (see Glossary) of granular media makes certain locomotion situations relatively straightforward to analyze, and subsurface locomotion is governed by relatively simple forces whose forms are similar to early theoretical approaches taken to understand movement in fluids at low Reynolds numbers (e.g. spermatozoa, nematode worms; Hatton et al., 2013; Goldman, 2014); wet substrate systems display richer but often more complicated interactions (Hosoi and Goldman, 2015; Dorgan, 2015; Sharpe et al., 2015b; McKee et al., 2016). Because environmental forces dominate inertial ones in dry granular systems (as in the world of microscopic organisms), purely kinematic models can capture the motion of animals (Purcell, 1977; Gong et al., 2015; Rieser et al., 2019 preprint). Furthermore, simple mathematical models ('resistive force theory') can capture a wide range of granular preparations, from particles of different size, roughness, compaction and incline (Li et al., 2013; Marvi et al., 2014); such models can also apply more broadly to frictional (but non-flowing) interactions (Rieser et al., 2019 preprint).

**Understanding locomotion through dry granular media: tools and techniques**

We now describe the suite of experimental, computational and theoretical tools we have developed to gain insight into granular locomotion, and which can be applied more broadly to other terrestrial locomotion scenarios.

**Experimental tools**

Recent progress in the study of locomotion in granular media has furnished a variety of tools that allow us to investigate and quantify the movements of limbless animals on and within granular media with remarkable thoroughness (Fig. 1). The fluidized bed is one of the most crucial tools – an apparatus that solves the problems of both regional heterogeneities in sand properties and history dependence (e.g. retention of tracks and disturbed media) by allowing the entire sand bed to be reset to a standard state for each experimental trial

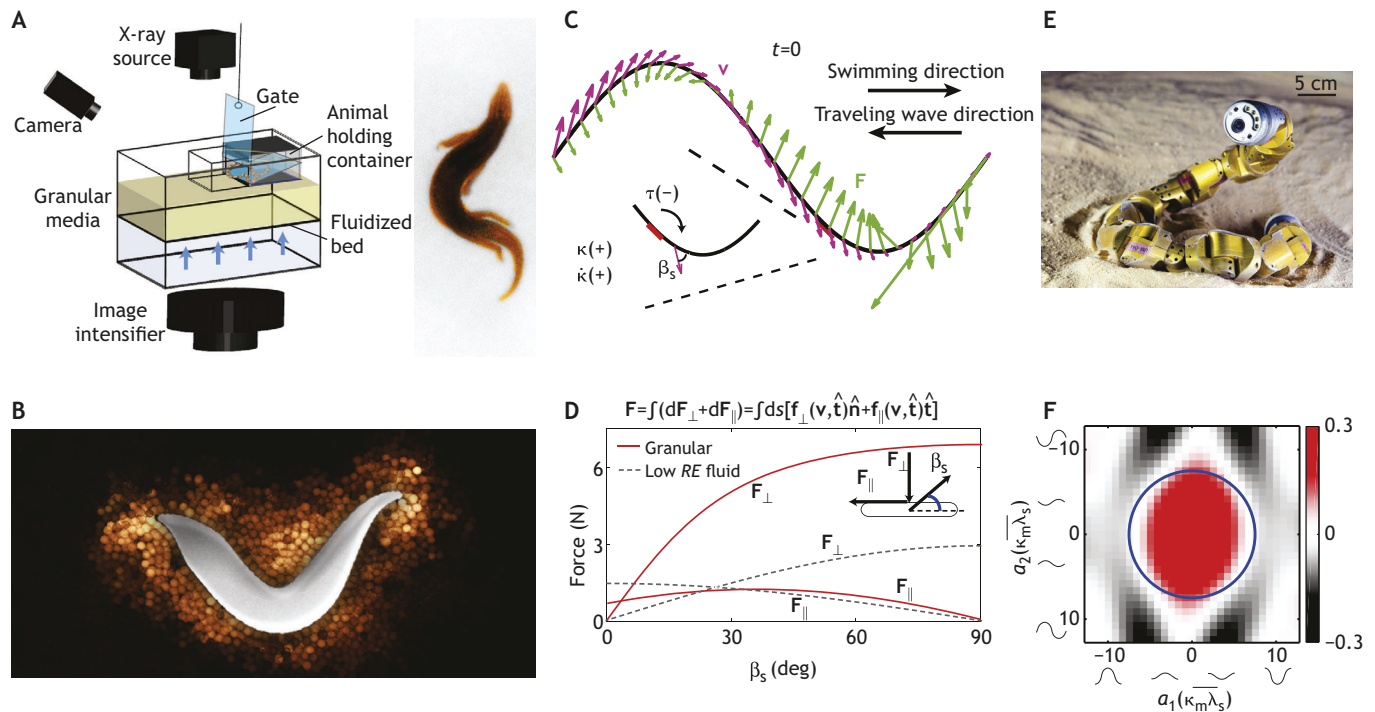

**Fig. 1. Tools for studying locomotion on and within granular media.** (A) A fluidized bed filled with granular media (yellow), showing the semipermeable base and airflow (blue arrows), situated for cineradiography (modified from Sharpe et al., 2015a); inset shows a false-color X-ray image. (B) Discrete element numerical simulation of a sandfish moving through particles. Lighter particle color indicates higher velocity. Image from Goldman lab. (C) Resistive force theory (RFT) applied to an undulating elongate body (modified from Ding et al., 2013). For each segment, purple arrows are velocity vectors,  $\mathbf{v}$ , green arrows are force,  $\mathbf{F}$ . Inset shows a segment at 0.6 body lengths, with the signs of curvature ( $\kappa$ ), curvature change ( $\dot{\kappa}$ ), torque ( $\tau$ ) and slip angle ( $\beta_s$ ). Red region indicates the predicted side of muscle activity at a given site. (D) Perpendicular and parallel forces ( $F_{\perp}$ ,  $F_{\parallel}$ ) versus orientation angle ( $\beta_s$ ) of a cylinder dragged through dry granular media and low Reynolds number ( $Re$ ) fluid. Equation for force is shown at the top;  $ds$ , the length of a small element of the curve;  $\mathbf{v}$ , velocity;  $\hat{\mathbf{t}}$ , tangent to curve element;  $\hat{\mathbf{n}}$ , normal to curve element;  $\mathbf{f}$ , force for a given segment  $ds$  (modified from Ding et al., 2012). (E) A multi-segment robophysical model of a snake (photo from Choset lab). (F) A constraint curvature function (CCF) from a geometric mechanics model of subsurface movement by a sandfish skink, *Scincus scincus* (a limbed lizard).  $a_1$  and  $a_2$  represent the amplitude of the relative body curvature ( $\overline{\kappa_m \lambda_s}$ ) for the two wave components. Waves along the axes show the relative curvature of each body wave along the axis. Blue circle shows the path using relative body curvature  $\overline{\kappa_m \lambda_s}$  values of the animal. The color scale shows units of body lengths/ $(\overline{\kappa_m \lambda_s})^2$ , a metric of body curvature (see text), multiplied by 100.

(Fig. 1A) (Li et al., 2009; Qian et al., 2015). In a fluidized bed, air is propelled by an air blower through a metallic honeycomb supporting a porous plastic surface that is impermeable to granular particles and upon which the medium rests (Fig. 1A). This airflow fluidizes the granular medium, removing any prior disturbances and irregularities. Upon cessation of the airflow, the medium falls into a standardized state (Li et al., 2009). Further modifications to enhance the utility of fluidized beds are available, including shaker motors and air pulses to control the packing fraction of the granular media (Li et al., 2009) and sub-fluidization airflow to reduce yield force (Brzinski and Durian, 2010; Gravish et al., 2010; Zhang et al., 2013). Movement on granular media can be tracked using standard and high-speed videography and motion-capture technology (although observing foot kinematics can be a challenge; Li et al., 2012); subsurface motion can be tracked using cineradiography (Maladen et al., 2009; Ding et al., 2013; Sharpe et al., 2013, 2015a; Fig. 1A).

Finally, physical modeling using robots (i.e. ‘robophysics’) provides a powerful tool to explore the interactions between locomotors and the granular substrate (Aguilar et al., 2016; Fig. 1E). The robophysics approach uses robots to discover principles of locomotion, often through exploration of parameter combinations not observed in animals, thereby determining the consequences of alternative morphologies and kinematic strategies. The repeatability enabled by robots allows more consistent testing and larger sample

sizes than with animals, and, when combined with fluidized beds, offers the potential for automated experiments (Qian and Goldman, 2015). Motors with appropriate feedback capabilities can measure force and position data, as well as electrical power consumption, and can provide indirect proxies for measurements that can be difficult to collect from animals (e.g. tendon force-buckles, sonomicrometry, respirometry). Lastly, robots allow validation of the mathematical tools described below (Maladen et al., 2011a,b).

### Computational and theoretical tools

Small systems of granular media can be modeled by computers via ‘discrete-element modeling’ (Ding et al., 2012; Maladen et al., 2011a,b; Fig. 1B), in which every particle’s interactions with other particles and with intruders (i.e. objects moving through the medium) are simulated. Although this approach is accurate, it is also computationally intensive even for systems of millions of particles; real sand beds can contain many orders of magnitude more grains. The ability to understand locomotion in the context of granular media has been substantially increased via the mathematical tool of resistive force theory (RFT) (Box 1; Maladen et al., 2009, 2011a,b; Li et al., 2013), originally developed to estimate the forces on low-Reynolds number ( $Re$ ) swimmers in Stokes’ flow (Gray and Hancock, 1955; Fig. 1C,D). RFT assumes that the total force acting on an object, such as an animal’s body, is a linear, independent summation of the forces acting on its constituent parts (Box 1). The

### Box 1. Resistive force theory

If we imagine an animal as being made of many small segments, the motion of a body segment through the surroundings can be described by its orientation and velocity, i.e. some angle,  $\beta_s$ , between the segment's tangent and velocity vectors. Using granular drag experiments, we can empirically determine an equation relating the motion of an object to the resulting granular stress. One drags an intruder (for example, a cylinder model for a body segment or a flat plate representing a section of body wall) through the granular media of interest and measures the forces on the intruder as it moves through the medium. One can then average the force in the steady state to obtain an estimate of the granular reaction force acting on a body part during steady-state locomotion. By carrying out these measurements over a range of  $\beta_s$ , one builds a continuous function relating segment motion to force using a range of curve-fitting methods (e.g. Fourier fit, polynomial fit, splines).

The tangent of a segment is determined by the shape and self-deformation of the animal. The velocity of the segment has two contributors; there is a velocity associated with the change of shape from one time point to the next, and there is a velocity arising from movement of the animal's center of mass (CoM). The former is determined solely by the self-deformation, whereas the latter arises from the interaction of the animal with the environment. Given the dissipative nature of granular media, we assume that the force on each body segment can be calculated independently of all other segments, such that the total force on the animal is simply the sum of these individual contributions. The force on a segment is related to  $\psi$  by the empirical equation. The angle  $\beta_s$  changes with the CoM velocity, so, for the prescribed kinematics, the RFT calculation numerically searches for the CoM velocity that yields zero net force on the body.

granular drag forces acting on body segments are measured in systematic experiments using intruding objects of various sizes, shapes and orientations moving through granular media in fluidized beds (Box 1). RFT calculations using these empirical measurements capture crucial aspects of movement through dry granular media, especially if history-dependent effects (e.g. footprints) are minimal and intruders move at moderate to slow speeds (Box 1) (Marvi et al., 2011; Mazouchova et al., 2013; Aguilar et al., 2016; McInroe et al., 2016).

Recent work has revealed that granular RFT emerges from features of a set of PDEs known as 'frictional plasticity models' (Askari and Kamrin, 2016; S. Agarwal, A. Karsai, D. I. Goldman and K. Kamrin, in preparation). Until recently, we have not had such equations; thus, this can be considered a major advance with great potential for future analyses. Solving the plasticity PDEs is computationally intensive; however, because RFT is accurate and straightforward, we can apply this method to calculate forces for infinitesimally small segments of a moving body (Li et al., 2013), and subsequently predict the performance of hypothetical waveforms (Maladen et al., 2009, 2011a,b) as well as power (Ding et al., 2012) and joint torques (Ding et al., 2012; Sharpe et al., 2013; Fig. 1C,D). Thus, as in the robophysical studies, the use of RFT in modeling allows the exploration of movement patterns beyond those observed in animals. Likewise, we can test whether the animals are indeed moving optimally, and determine the consequences of alternative movement patterns (Fig. 1C,D). Further, combining RFT with analytic tools from geometric mechanics (Hatton et al., 2013) enables visualization of optimal or alternative gaits and limb-coordination patterns, subject to kinematic constraints and body morphology, without the need for detailed calculations (Fig. 1F).

Our comparative approach uses the mechanical properties of sand, the diversity of morphology and behavior of squamate reptiles, and mathematical tools such as RFT and geometric mechanics to

describe and test the functional principles of locomotion. This robust approach can test basic principles of locomotor performance, with clear applications to evolutionary biology, biomechanics and, ultimately, robotics. Furthermore, our approach allows bi-directional transfer of knowledge between biology and physics/robotics: testing of observed and quantified biomechanical performance by animals can lead to physical insights, which in turn can allow exploration of parameter ranges beyond those observed in biology, thereby allowing direct comparison between observed behaviors and hypothetical alternatives. This reciprocal approach informs robotic potential and allows for systematic testing of biological systems, which facilitates objective tests of adaptation and optimization, and even allows us to understand the influences of phylogeny with respect to locomotor opportunity or constraint.

### Insights gained from sand specialists

In order to demonstrate the potential insights to be gained from the study of locomotion in granular media, below we discuss recent work focused on three species that specialize in movement on or through sand: the sandfish skink (*Scincus scincus*), the Mohave shovelnose snake (*Chionactis occipitalis*) and the sidewinder rattlesnake (*Crotalus cerastes*) (Fig. 2A–C). These animals are 'sand specialists', because they not only inhabit dune fields but also have developed specialized modes of locomotion: sand swimming in *S. scincus* and *Ch. occipitalis*, and sidewinding in *Cr. cerastes*. These case studies will illustrate how application of the tools and methods for granular systems can provide insights into physiology, behavior, control and evolution.

### Sand swimming

The sandfish (*S. scincus*) (Fig. 2A) is a quadrupedal skink, native to North Africa and the Arabian Peninsula; it takes its name from a remarkable escape behavior of rapidly diving head-first into the sand and then submerging (Arnold, 1995). Although the sandfish possesses prominent limbs, these adduct completely during subsurface burial, resulting in functionally limbless undulatory propulsion (Maladen et al., 2009). Cineradiography of subsurface locomotion in a fluidized bed reveals that sandfish achieve rapid subsurface locomotion ( $\sim 1.2$  body lengths  $s^{-1}$ , up to 4 Hz), but the body segments show significant rearward slipping due to media yielding around the body (Maladen et al., 2009). To facilitate analysis, body posture was characterized using the number of waves on the body ( $\xi$ ) and relative body curvature ( $\kappa_m \lambda_s$ , the arc length of one wave divided by the maximum radius of curvature; Sharpe et al., 2015b), a non-dimensional metric for the degree of bending, which is independent of both animal size and number of body waves. Performance is described using metrics such as estimated center-of-mass velocity, wave efficiency and slip angle (Maladen et al., 2009; Sharpe et al., 2015a). Wave efficiency ( $\eta$  – forward body speed divided by wave propagation speed) or undulation efficiency ( $\eta_u$ , forward distance moved per cycle divided by the arc length of one wave) quantify how effectively body motion is converted to forwards motion, with no slip resulting in a value of  $\eta=1$  and no forward motion resulting in a value of  $\eta=0$  (Maladen et al., 2009; Sharpe et al., 2015b). Slip angle ( $\beta_s$ ) is defined as the angle between the vector tangent to the body axis at a given point and the velocity vector of that same point (Fig. 1C); if there is no slip, each point follows the path of the points before it and  $\beta_s$  will be zero, whereas any slipping will produce higher values. Unlike  $\eta$ ,  $\beta_s$  can be calculated within a cycle and along the body, allowing analysis of where the slip occurs along the body and in which phase of the

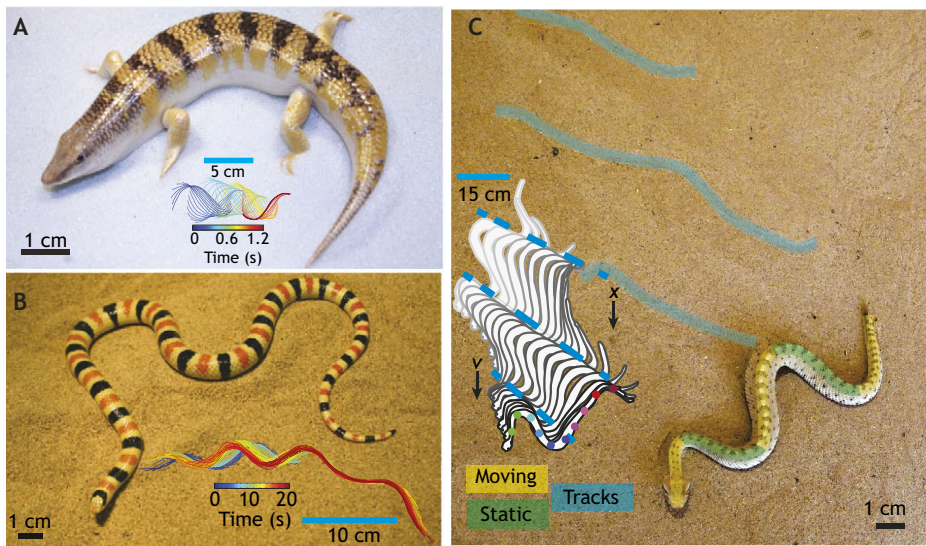

**Fig. 2. Example species for studying locomotion on and within granular media.** (A) The sandfish skink (*Scincus scincus*). Inset shows a time sequence of subsurface movement. Modified from Sharpe et al. (2015a). (B) The Mohave shovelnose snake (*Chionactis occipitalis*). Inset shows a time sequence of subsurface movement. Modified from Sharpe et al. (2015a). (C) The sidewinder rattlesnake (*Crotalus cerastes*). Photo from the Astley lab. Inset shows a time sequence of movement. Modified from Marvi et al. (2014). Inset scale bars are blue; main image scale bars are black.

cycle, though it can also be averaged to generate a whole-animal measurement (Sharpe et al., 2015a).

Slip in sand swimming causes a decrement to locomotor performance, raising the question of whether such slip is unavoidable, and, if so, whether the sandfish are using the waveform with the maximum undulatory efficiency ( $\eta_u$ ) possible for them. Sandfish use only a limited range of waveforms during sand swimming (Maladen et al., 2009), so exploration of alternative kinematic strategies requires a combination of mathematical and robotic modeling. Applying RFT to simulated sandfish waveforms allows calculation of  $\eta_u$  across a range of body configurations, including some not observed in the animals, showing that the sandfish operates near the optimum waveform for its morphology in terms of  $\eta$  (Maladen et al., 2009),  $\eta_u$ ,  $\beta_s$  (Sharpe et al., 2015a) and mechanical cost of transport (mCoT; Sharpe et al., 2015a; Fig. 3A–C). These calculations were tested using a robotic model, and the results closely match the robot-specific RFT results (Maladen et al., 2011a,b), as well as results of discrete element modeling (Ding et al., 2012; Maladen et al., 2011a,b). Results from the robotic model also support the fundamental relationship seen in the calculations involving sandfish. Torque calculated using RFT for different segments within the body closely matches observed electromyographic signals from burrowing sandfish (Sharpe et al., 2013; Fig. 3D). This provides a potential explanation for the generalized phenomenon of neuromechanical phase lag (the temporal delay observed between muscle activity and the resultant axial bending in undulatory aquatic locomotion across many species) (Ding et al., 2013).

The efficacy and efficiency of limbless locomotion in granular systems, both on the surface and beneath, raises the question of why sandfish retain their prominent legs. During the burial phase of sand swimming, sandfish fold their legs back against the body much like a swimming crocodile (Maladen et al., 2009). Yet, limb reduction and loss is common among scincid lizards (Wiens et al., 2006; Whiting et al., 2003), highlighting an apparently exceptional limbed morphology in the sandfish. To examine this, the motion of the sandfish limbs was tracked prior to, during and after burial, and the effect of limb restraint on burial speed was investigated (Sharpe, 2013). Sandfish use all four limbs to propel themselves on the surface and to plunge their snout into the substrate, but each limb pair folds back against the body as soon as it is submerged (Fig. S1A–C) (Sharpe, 2013). Temporarily restraining the limbs in

various combinations revealed the crucial role of the limbs (particularly the forelimbs) in sand burial (Fig. S1D–F) (Sharpe, 2013). Thus, the limbs are used on the surface, and appear to be crucial for crossing the surface–substrate boundary.

The Mohave shovelnose snake (*Ch. occipitalis*) independently evolved sand-swimming behavior, thereby allowing for a comparison with the sandfish to test the generality of these principles. Its drastically different morphology allows further exploration into the mechanics of subsurface locomotion in sand (Sharpe et al., 2015b). *Chionactis occipitalis* outperforms sandfish on every metric ( $\beta_s$ ,  $\eta$  and mCoT) except speed, with burrowing speed 1/10th that of the sandfish (Sharpe et al., 2015a) (Fig. 3A–C). RFT modeling shows that the improvement in snake performance is due to both lower friction between the scales and the sand and the more elongate, flexible body form, which enables the snake to access combinations of relative body curvature and number of body waves that are anatomically inaccessible to the sandfish (Sharpe et al., 2015a; Fig. 3A–C). However, both species perform close to the optimal kinematics for their body form (Sharpe et al., 2015a; Fig. 3A–C), potentially due to strong evolutionary selective pressure to minimize the tremendous mechanical demands of sand swimming. This is an insight only possible through the combined use of living animals, cineradiography, fluidized beds, RFT and robotics in a granular system.

### Sidewinding

Limbless vertebrates moving on the surface of granular media use all known methods of limbless vertebrate locomotion (rectilinear, concertina, lateral undulation and sidewinding; Table S1), but here we focus on sidewinding. Sidewinding illustrates a crucial aspect of movement on the surface of granular media: the ability to control the forces (and minimize yielding) on body segments by lifting and lowering portions of the body (Jayne, 1986; Marvi et al., 2014).

Sidewinding involves undulation in both the lateral plane (typical of snakes) and the vertical plane (Fig. 2C, Fig. 4A,B). It is known in a few species of viperid snakes moving across dry sand (Mosauer, 1932; Brain, 1960; Jayne, 1986; Gans and Kim, 1992), and is also used by homalopsid and natricine snake species to traverse wet granular media (Jayne, 1986). Unlike concertina and lateral undulation, which make sliding contact with the ground that may cause yielding of granular substrates, sidewinding snakes maintain

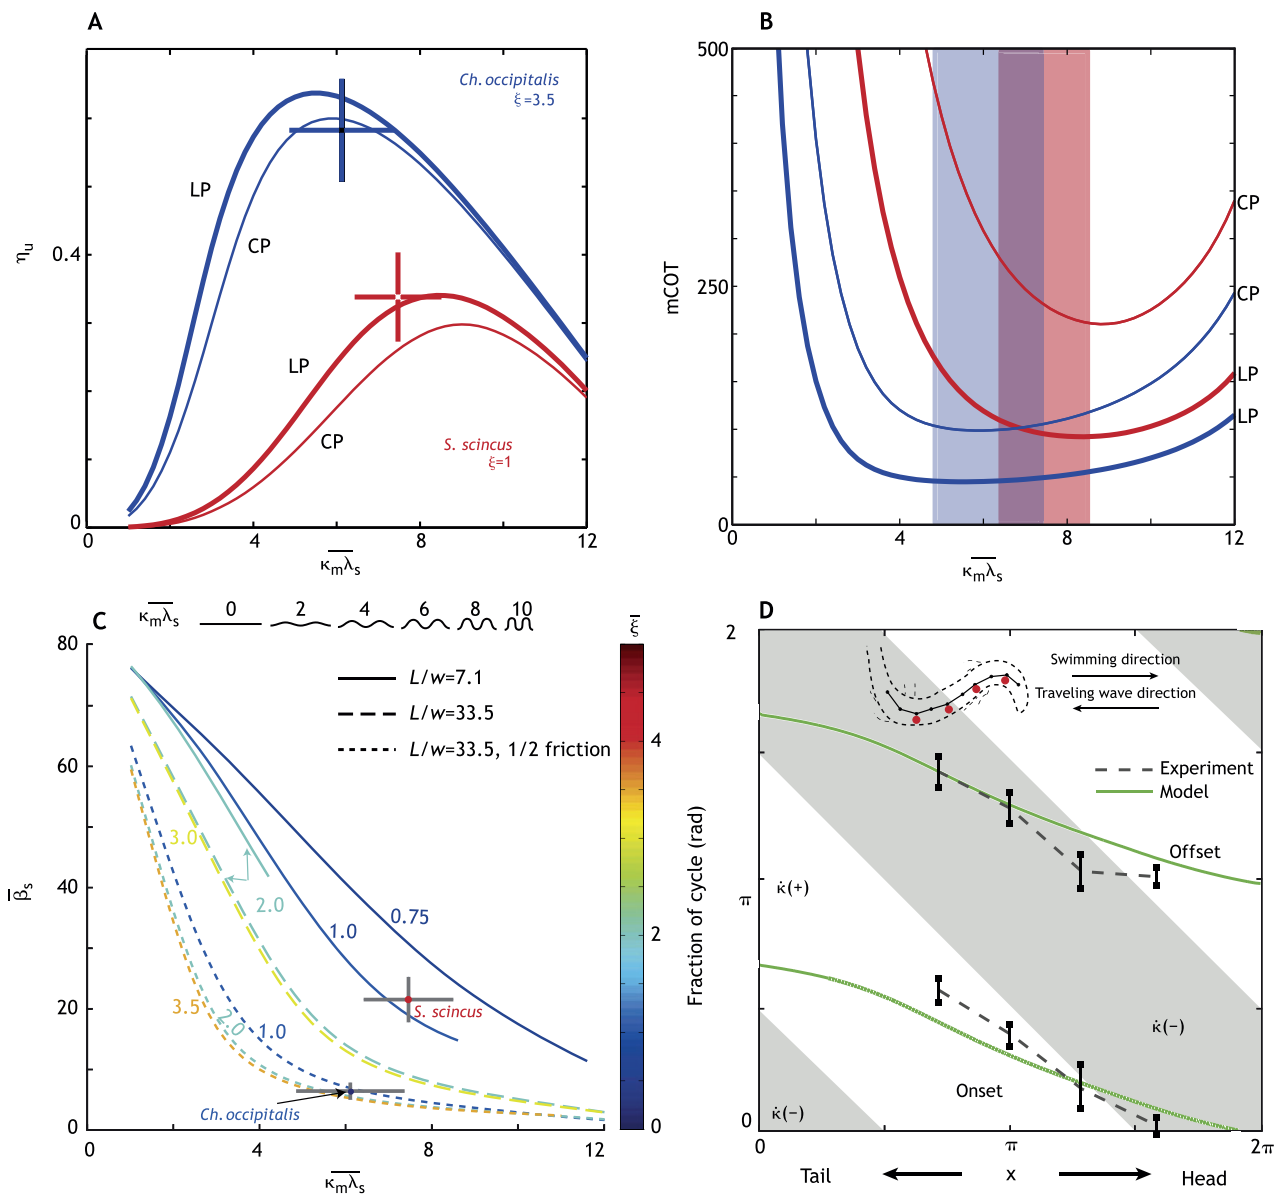

**Fig. 3. Comparison of experiments and models of sand swimming in sandfish and shovelnose snake.** (A) Curves depicting undulatory efficiency ( $\eta_u$ ) for RFT-calculated undulating bodies with the skin friction and wave number ( $\xi$ ) observed in the animals (sandfish shown in red and shovelnose snake shown in blue), at various mean relative body curvatures ( $\overline{\kappa_m \lambda_s}$ ). LP and CP denote loose-packed and close-packed sand. + symbols denote the range of  $\eta_u$  and  $\overline{\kappa_m \lambda_s}$  observed in each animal. (B) Curves depicting mechanical cost of transport (mCoT) at various mean body curvatures ( $\overline{\kappa_m \lambda_s}$ ) as in A. Shaded regions denote the range of  $\overline{\kappa_m \lambda_s}$  observed in each animal. (C) Mean slip angle ( $\beta_s$ ) at various mean body curvatures ( $\overline{\kappa_m \lambda_s}$ ), with line type denoting different combinations of body length/width ratios ( $L/w$ ) and friction. + symbols denote the range of  $\beta_s$  and  $\overline{\kappa_m \lambda_s}$  observed in each animal. Color scale indicates wave number ( $\xi$ ). (D) Neuro-mechanical phase lag predicted by an RFT model compared with experimental data on electromyographic (EMG) onset and offset. The horizontal axis shows position along the body, and the vertical axis shows the fraction of a cycle, expressed in radians, where  $2\pi$  is a complete locomotor cycle. Increasing body curvature  $\dot{\kappa}(+)$  and decreasing body curvature  $\dot{\kappa}(-)$  are indicated by white and gray regions, respectively. Inset shows electrode implant sites (red). A–C modified from Sharpe et al. (2015a); D modified from Ding et al. (2013).

approximately (low slip) static contact points with the sand (and rigid substrates), lifting and lowering the body segments as they move (Fig. 2C, Fig. 4A,B; Rieser et al., 2019 preprint).

The net motion of the snake that emerges from these lifting and lowering patterns resembles that of a flattened ‘helical spring’ (Mosauer, 1930) or ‘virtual tread’ (Hatton and Choset, 2010; Gong et al., 2012) rolling across the ground, although the snake’s dorsal surface remains upwards at all points unlike the spring. This motion can be decomposed into two orthogonal body waves, vertical and horizontal,  $\pm\pi/2$  ( $\pm 90$  deg) out of phase with each other, resulting in

posteriorly propagating waves of lowered static contact and lifted movement, such that a point along the body is cyclically lifted clear of the sand, moved forward, then placed back into static contact (Fig. 2C, Fig. 4A,B) (Marvi et al., 2014; Astley et al., 2015). This two-wave template allows not only easier understanding of a visually confusing locomotor mode (Pope, 1955) but also the modeling of sidewinding in snake robots with vertical and horizontal degrees of freedom, either by application of the neuromechanical template (see Glossary; Marvi et al., 2014; Astley et al., 2015) or by two-wave-based mathematical analyses

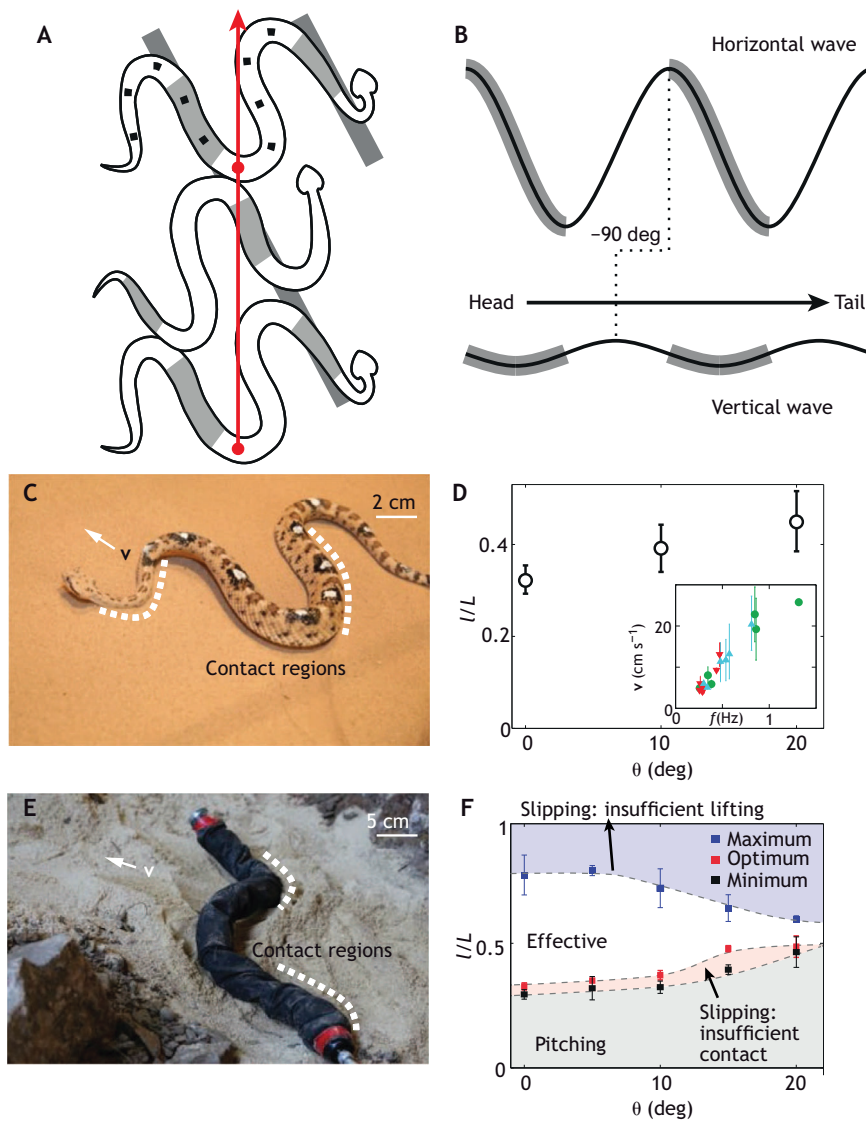

**Fig. 4. Sidewinding on sand.** (A) Schematic diagram of sidewinding, showing three sequential postures. Static regions of the body are shaded gray, as are the consequent tracks; white regions are moving and are lifted above the substrate. Black squares indicate markers on the body, while the red arrow shows the direction of motion for a given point (red dot) over a cycle. Modified from Astley et al. (2015). (B) Sidewinding represented by a horizontal and vertical wave offset by  $-\pi/2$ . Gray shaded regions are in static contact with the ground. Modified from Astley et al., 2015. (C) An example frame for a sidewinder ascending a slope, showing the direction of movement (arrow) and contact regions (white dashed lines). (D) Change in contact length as a fraction of total body length ( $l/L$ ) in sidewinders on slopes of 0, 10 and 20 deg. Inset graph shows the relationship between speed and frequency. (E) An example frame of video of a robot snake ascending a slope by sidewinding, showing the direction of movement (arrow) and contact regions (white dashed lines). (F) Consequences of different relative contact lengths ( $l/L$ ) for a robot on the same range of slopes as the sidewinders. Light gray, light blue and light red regions indicate robot failures due to pitching, slipping due to insufficient lifting and slipping due to insufficient contact, respectively; blue and black squares indicate observed robot data at the maximum and minimum contact lengths resulting in forward progress; red 'optimal' squares show the highest velocity contact length. The white region shows effective sidewinding by the robot. C–F modified from Marvi et al. (2014). Error bars in D and F are standard deviation.

of motion-capture data to gain insight into template modulation to produce complex behaviors (Gong et al., 2015) (Fig. 4B).

Control of contacts with the substrate is essential to sidewinding, both in generating the fundamental locomotor template and in the modifications of this template to allow effective locomotion under different conditions. Lifting allows some body segments to interact with the substrate while others do not, a trait also used in lateral undulation (Hu et al., 2009), albeit less dramatically. In the absence of the vertical wave in the template, sidewinding simply is lateral undulation (Astley et al., 2015) – the plesiomorphic locomotor behavior in squamates, legged or non-legged. This vertical component of the template allows for subtle control, such as the ability to control the relative length of the body segments that are in contact with the granular media, which is crucial in order to ascend inclined sand with minimal slip in spite of the decreasing granular yield forces of the sand with increased incline (Fig. 4D; Marvi et al., 2014). This strategy has been replicated in a robotic model to enable successful climbing of granular slopes, and the robophysics approach has been used to test combinations of contact length and incline not observed in the snakes, thus determining the consequences of parameters not observed in nature (Fig. 4F) (Marvi et al., 2014). These robophysical tests revealed that snakes

are near the optimum of a range of effective kinematics; this range decreases with increasing incline (Fig. 4F; Marvi et al., 2014).

Sidewinding allows snakes to overcome the challenges of surface locomotion on granular media over a wide range of conditions (Marvi et al., 2014; Astley et al., 2015); however, clear, cyclic sidewinding is known only from a handful of caenophidian species (Brain, 1960; Gans and Mendelssohn, 1972; Jayne, 1986), mostly vipers (Gans and Mendelssohn, 1972), with the additional description of a similar, but non-cyclical behavior in a green anaconda (*Eunectes murinus*; Ryerson and Horwitz, 2014). The taxonomic distribution of these species across multiple clades of alethinophidian snakes raises the possibility that either sidewinding has convergently evolved multiple times or, more parsimoniously, that virtually all snakes can sidewind, to some extent, if presented with suitably challenging granular substrates.

To test these alternatives, we encouraged 30 snake species from a range of taxonomic groups and habitats in the Zoo Atlanta collection (Table S1) to move on our fluidized bed at 0, 10, 20 and 27 deg inclines, the last being the avalanche angle of the sand. Only two of 30 species used sidewinding in any condition (*Cr. cerastes* and the Northern watersnake, *Nerodia sipedon*, the latter only very briefly), whereas the remaining species never

performed sidewinding even when failing to move using other modes (Table S1, Movie 1; Marvi et al., 2014). Instead, most species used either lateral undulation or concertina locomotion, sometimes resorting to the latter when the former failed, and none were capable of moving uphill at the avalanche angle like the sidewinder. Although strictly proving the absence of a behavioral trait is impossible, it is unlikely that failing animals would refuse to use an effective alternative locomotor mode if it was available to them. This suggests that sidewinding is not present in most snakes and therefore evolved independently several times.

The strongest predictor of performance on sand was taxonomy, specifically whether the snake was a viper – 25% of vipers we tested failed to move even on level sand, whereas all non-vipers succeeded in doing so, and only two vipers could ascend granular inclines (*Cr. cerastes* and the speckled rattlesnake, *Crotalus mitchellii*, the latter relying on a mix of rectilinear and concertina locomotion; Table S1). Although the mechanistic explanation for this discrepancy remains unknown (and is the subject of ongoing investigation), it suggests that the prevalence of sidewinding in vipers is not due to some inherent advantage of vipers (Gans and Mendelsohn, 1972), but rather is due to a fundamental locomotor deficit that prevents vipers from accessing sandy habitats without the evolution of sidewinding. This matches observations of viperid

species distributions across the Mojave Desert, where several viper species inhabit consolidated terra firma substrates or rocky slopes, but regional sand dune systems are exclusively populated by sidewinders (J.R.M., personal observation).

Among the snakes using lateral undulation on the granular media, some individuals did not make any progress (e.g. Fig. 5A,D), some experienced high slip but made effective forward progress (Fig. 5E,G), whereas others, including the desert specialist *Ch. occipitalis*, moved with little slipping (Fig. 5B,C,F,H). Effectiveness was related to how the animal’s motion remodeled the granular substrate – the tracks. Snakes that failed pushed material lateral to the long axis of the body (Fig. 5A) whereas successful snakes pushed material both laterally and posteriorly (Fig. 5B,C).

Modeling lateral undulation on the surface is complicated by the material hysteresis. However, RFT accurately captured the performance of snakes that did not slip enough to re-encounter their own tracks, and it predicted trends, giving insight into anatomic and kinematic features impacting performance. As in subsurface sand swimming, RFT predicted that performance depended on body elongation (Fig. 5I, black curve;  $L/w$  is total body length divided by the width at the widest part; Fig. 5I, inset) and kinematics (Fig. 5J, black curve). In accordance with this prediction, long, slender snakes moved with low slip (Fig. 5I, blue

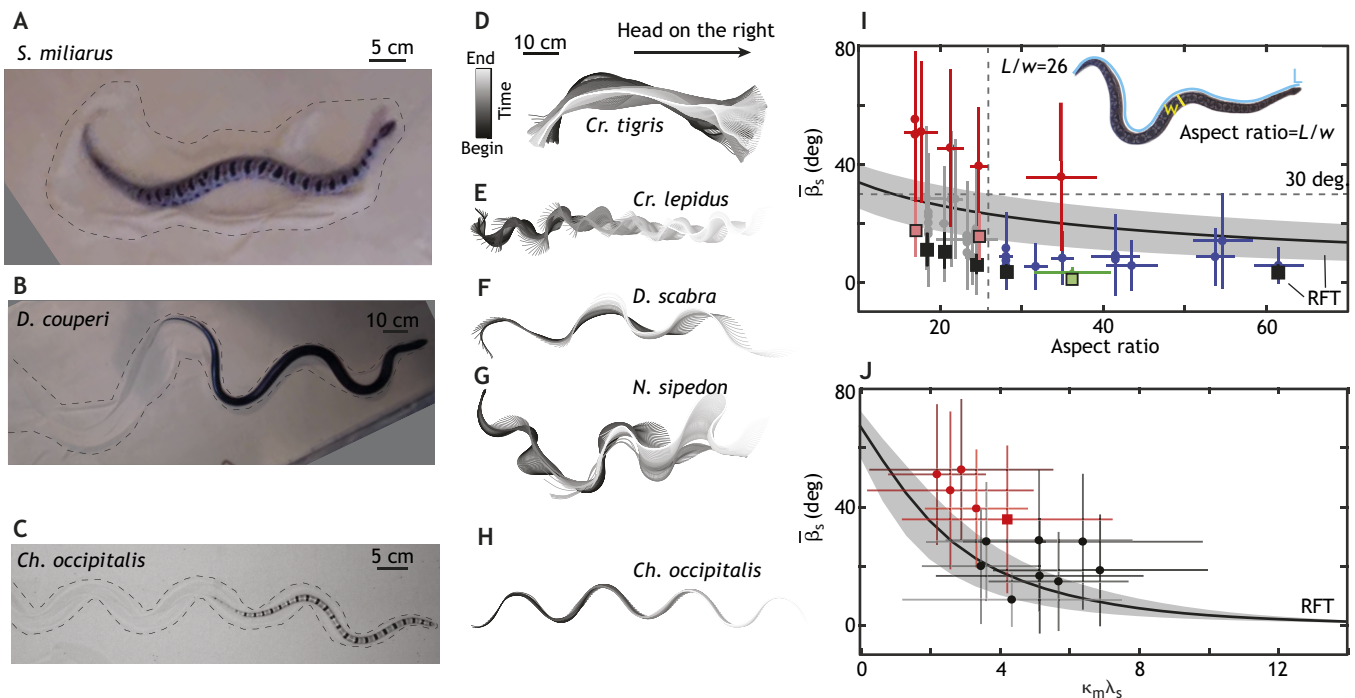

**Fig. 5. Body shape and kinematics impact ability to progress across granular surface.** (A–C) Snapshots of snakes moving on the surface of granular media. Dashed lines indicate the disturbed area. (A) *Sistrurus miliarius*, on natural sand collected from Yuma, AZ, USA. (B) *Drymarchon couperi*, on the same sand as in A. (C) *Chionactis occipitalis* on 300 μm glass particles. (D–H) Digitized animal midlines colored by time from beginning (dark) to end (light) of the trial. D–G are on Yuma sand; H is on glass particles. (D) *Crotalus tigris*. Trial length ( $t_{tot}$ )=25.7 s, time between plotted midlines ( $\Delta t$ )=100 ms. (E) *Crotalus lepidus*,  $t_{tot}$ =9.4 s,  $\Delta t$ =33 ms. (F) *Dasyplettis scabra*,  $t_{tot}$ =1.6 s,  $\Delta t$ =33 ms. (G) *Nerodia sipedon*,  $t_{tot}$ =6.0 s,  $\Delta t$ =33 ms. (H) *Chionactis occipitalis*,  $t_{tot}$ =1.25 s,  $\Delta t$ =12 ms. (I) Slip versus aspect ratio ( $L/w$ ) (inset, *Acrantophis dumerili*  $L/w=23.2$ ). Circle markers and vertical lines indicate the mean and standard deviation of each trial. Horizontal bars are the range of aspect ratios measured from video stills by two different researchers. Gray indicates successful trials, red indicates failures, green is *Ch. occipitalis*. Markers at the same  $L/w$  indicate multiple trials for the same individual.  $N=22$  animals,  $n=38$  animal trials. Only the mean is shown for *Ch. occipitalis*,  $N=9$ ,  $n=30$ . Black curve is the RFT prediction of slip using average snake waveform and mass and a scale friction  $\mu=0.15$ . Gray area indicates predictions for estimated minimum/maximum  $\mu=0.1$  (lower slip) and 0.2 (higher slip). Scale friction estimated using Hu et al. (2009) and Baum et al. (2014). Squares are the RFT prediction of slip for that animal using a scale friction of  $\mu=0.15$ , vertical line is the minimum/maximum. For *Ch. occipitalis*,  $\mu=0.1$  (Sharpe et al., 2015b) and minimum/maximum  $\mu=0.05/0.15$ . All RFT predictions used force relations for 300 μm glass beads at an intrusion depth of 8 mm. (J) Slip versus  $\kappa_m \lambda_s$  for animals with  $L/w < 26$ . Mean and standard deviation from combined trials of an individual are shown. Successful trials are in black, failures are in red; square represents the snake with  $L/w > 26$ . Black curve is the RFT prediction using average waveform and anatomy of all species studied, mean wave number  $\bar{\xi}=2.5$ , mass=0.63 kg,  $L=89$  cm,  $\mu=0.15$ . Gray band is minimum/maximum  $\mu=0.1/0.2$ .



and green markers), with one exception (a viper, *Bothriechis schlegelii*), while slip was high among stout snakes. Some stout snakes were still able to progress (e.g. Fig. 5E), although slip was variable (Fig. 5I, gray markers), whereas others failed to move, undulating in place as in Fig. 5A (Fig. 5I, red markers). Among stout snakes, those using high relative curvature waveforms moved with lower slip than those at lower relative curvature (Fig. 5J), a trend captured by RFT (Fig. 5J, black curve). RFT predicted performance of those snakes which succeeded (Fig. 5J, black squares), but underpredicted slip of snakes which failed (Fig. 5J, red squares). This was because the model did not include material remodeling; high-slip snakes re-encountered previously disturbed material, thus experiencing forces dependent on the changed substrate state.

### A unifying framework for locomotion: geometric mechanics

Although RFT can calculate the consequences of a particular waveform, exploration of alternative behaviors is time consuming and non-intuitive. However, by combining RFT with geometric mechanics, we can understand the performance consequences of a wide range of parameters in an intuitive way, fostering insights into the mechanical and evolutionary consequences and tradeoffs of behavior. The minimal role of inertia in many forms of movement on or in dry granular media has facilitated the application of this mathematical framework for locomotion (referred to as ‘self-propulsion’) developed decades ago in physics. This framework can unify our understanding of locomotion by allowing diagrammatic

visualization of effective (and ineffective) patterns of body undulation and limb motion. The motion of microorganisms in fluids at low Reynolds number (Purcell, 1977) inspired the creation of a systematic approach to link ‘self-deformations’ (changes in body shape and limb position) to translations and rotations in the environment (Wilczek and Shapere, 1989; Murray and Sastry, 1993; Walsh and Sastry, 1995; Ostrowski and Burdick, 1998; Melli et al., 2006; Shammas et al., 2007; Morgansen et al., 2007; Avron and Raz, 2008; Hatton and Choset, 2011, 2013, 2015). Although this geometric framework was originally developed for low-*Re* swimmers, robotic models showed it could be applied in granular media (Hatton et al., 2013), where the highly damped ‘frictional fluid’ aspects of the granular interaction result in motion that depends largely on sequences of shape changes (thus the term ‘geometric’ mechanics).

The essential approach of geometric mechanics is to analyze the effects of transit around closed (cyclic) paths in a ‘shape space’. Such a space contains representations of all possible shapes (postures) of the organism (see examples in Fig. 6A–C), and short segments in a path in the space connect different instantaneous shapes via ‘self-deformations’. Broadly speaking, if we determine the coupling between small self-deformations and real world displacements, we can calculate the net movement over a cycle by summing the small displacements. This sounds simple, but solving the inverse problem of which cycles best combine the available displacements is computationally expensive and can be difficult to

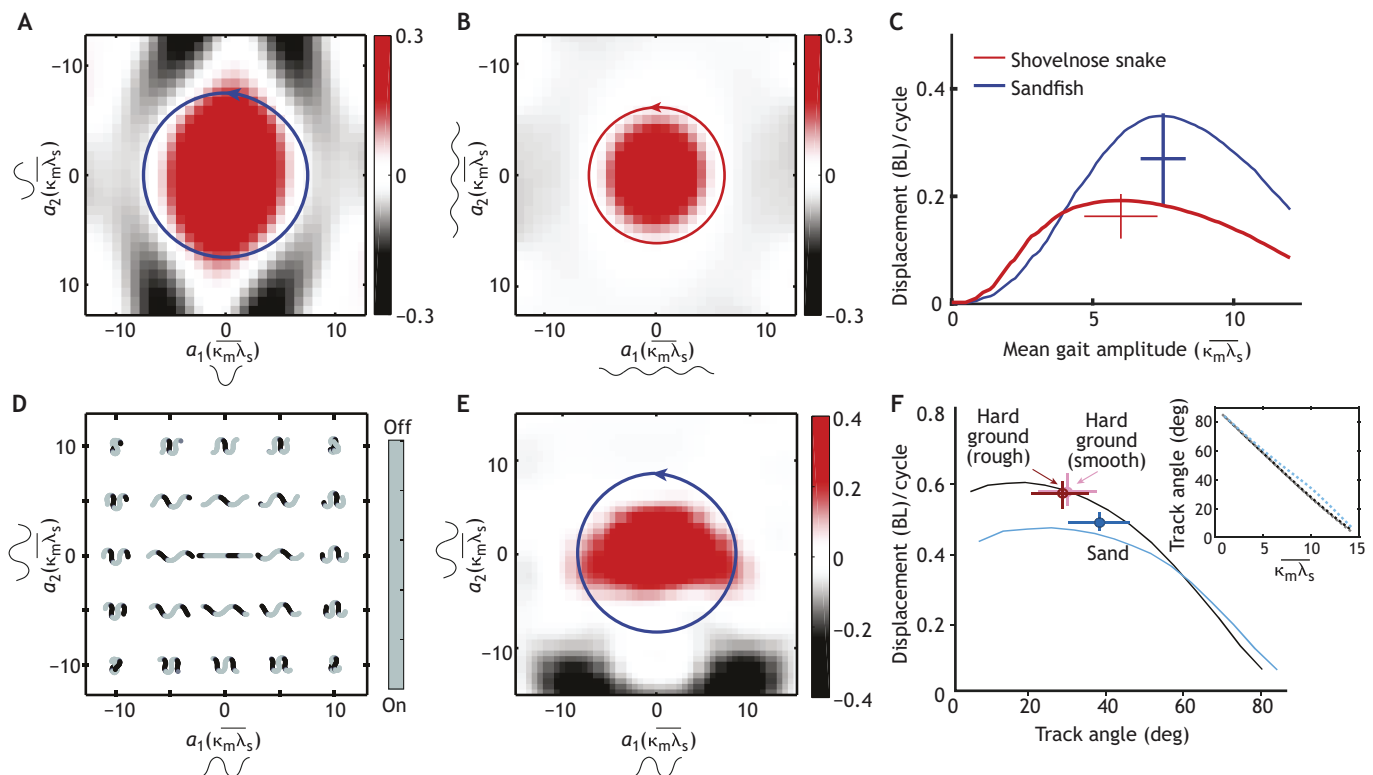

**Fig. 6. Geometric mechanics of locomotion in granular media.** Constraint curvature functions (CCFs) for the sandfish lizard (A) and shovelnose snake (B); the color scale shows units of body lengths/ $(\kappa_m \lambda_s)^2$ , multiplied by 100. A and B show the paths for the mean relative curvature ( $\kappa_m \lambda_s$ ) observed in the animals (solid circle), with  $a_1$  and  $a_2$  representing the amplitude of the two wave components. (C) The displacement per cycle predicted using geometric mechanics (solid curves) and animal data for subsurface movement; vertical and horizontal lines on animal data are  $\pm 1$  s.d. (D) Shape space showing a posture-dependent animal–environment contact model for an animal with 1.5 waves along its body during sidewinding. (E) CCF for sidewinding on sand with 1.5 waves along the body. The blue circle shows the average performance of *Cr. cerastes* on sand. (F) Comparison of geometric mechanics predictions with biological data for the movement of different animals on different substrates. Dark red, *Cr. cerastes* on a rough rigid surface; light red, *Cr. cerastes* on a smooth rigid surface; blue, *Cr. cerastes* on a 7.6 cm layer of sand. Inset: track angle versus relative curvature along the body for sand (blue) and hard ground (black).

visualize. In recent years, advances have solved some of these difficulties (Hatton and Choset, 2015). Although initially limited to simple shapes with few joints, recent developments have allowed generalization to undulating, continuous swimmers in granular media (Hatton and Choset, 2011; Gong et al., 2016; Ramasamy and Hatton, 2016, 2017; Rieser et al., 2019 preprint), by representing these body shapes as a combination of two waves whose curvature varies sinusoidally in position along the body (called serpenoid waves; Umetani and Hirose, 1975); this system can be generalized to more than two shape variables if needed (Ramasamy and Hatton, 2019; Bittner et al., 2018). A geometric mechanics MATLAB software package is available at <https://github.com/OSU-LRAM/GeometricSystemPlotter/releases> (Ramasamy and Hatton, 2019).

For systems with two shape parameters (e.g. two joint angles, or the amplitude of two modes of continuous bending), the results from the geometric mechanics approach can be visualized as a set of scalar ‘constraint curvature functions’ (which we will refer to as CCF; see Glossary) over the shape parameter space (with one CCF for each direction of translation or rotation); Fig. 6A,B shows forward displacement CCFs for the sandfish and shovelnose snake. The beauty of the approach is that, given a path in the CCF space (again, a pattern of cyclic self-deformation), we can immediately determine whether this is a ‘good’ or ‘bad’ gait (in terms of displacement) simply by summing the amount of positive and negative surface enclosed (red and black colors in Fig. 6A,B). Given that the CCFs are generated from the environmental interactions and body morphologies, these tools therefore allow evaluation of the observed behavior of an animal and determine whether the animal is optimizing for a given performance metric (Nishikawa et al., 2007; Marvi et al., 2014; Astley et al., 2015; McInroe et al., 2016), as well as predicting the consequences of alternative morphologies and behaviors that are not observed in the animals.

Geometric mechanics analysis can also be used for locomotion on the surface of the sand, including locomotion with discontinuous contacts, as in the case of sidewinder rattlesnakes. Mapping the contact region onto the posture shape space (Fig. 6D) allows calculation of a CCF for sidewinding (Fig. 6E). These calculations can be repeated for animals moving on rigid surfaces with both high and low friction and compared with previously collected kinematic data (Schiebel et al., 2019 preprint); this shows that animals use 1.5 waves per body length. Track angle can be calculated from body waveform, allowing comparison with many more species (Rieser et al., 2019 preprint) (Fig. 6F, inset). Observed data and geometric mechanics calculations agree well, showing that snakes perform better on rigid surfaces (possibly analogous to hard-packed sand in portions of their habitat), but perform close to optimally under both conditions (Fig. 6).

Thus, we can return to the performance data for the species discussed above (e.g. Fig. 3) with a new ‘geometric’ eye on the problem. If we make the approximation that the animals use traveling body waves of sinusoidal local curvature, this leads to circular paths in the CCF composed of two modes that approximate the animals’ shape changes (though the actual path of the animal may be non-circular). Remarkably, the animals operate near paths that (out of all circular paths) achieve most displacement per undulation cycle (Fig. 6C), those that essentially follow zero-contours (white regions in Fig. 6A,B); thus, we can conclude that these traveling wave patterns enable the observed rapid movement within and on granular material.

The great power of the geometric diagrams is to provide insights into the functional consequences of an animal’s choice of a particular path through space, potentially allowing us to understand

why an animal does or does not choose a particular path. That is, geometric mechanics provides candidate control templates and facilitates our understanding of how these can/should change as a function of environment, morphology, body properties, etc. For example, because muscular contractions have a limited peak power and because speed is the product of the displacement per cycle and the cycle rate, further study is needed to determine how muscle physiology, morphology and interactions with the surrounding media influence the effort required for different cycle geometries. The results of these studies will allow us to geometrically identify speed-optimal gaits that balance displacement per cycle against cost per cycle (Ramasamy and Hatton, 2016). Interestingly, these tools also work for the sand swimmers and the sidewinders, indicating their applicability to both fluid-like and solid-like situations. Future research directions should thus include overlaying models of muscle dynamics onto the geometric locomotion framework, as well as collecting new *in vivo* data to test whether snakes may in fact be using a non-uniform wave amplitude (which would be an oblong path in Fig. 6B) to better take advantage of the geometry of the CCF.

### Conclusions and challenges

These examples have shown how the study of locomotion on granular media can give substantial insights into the fundamentals of limbless locomotion, including such concepts as neuromechanical phase lags, control templates and morphological and behavioral evolution (Ding et al., 2013; Sharpe et al., 2013, 2015a; Marvi et al., 2014; Astley et al., 2015). Counterintuitively, the homogeneous and speed-independent, yet mechanically complex and demanding nature of these substrates makes mathematical analysis and robotic modeling more feasible than for systems such as fluids, while still imposing sufficient demands on locomotion to prompt interesting and ecologically relevant tests of evolutionary adaptations in nature. Furthermore, the triad of biology, physics and robotics applied in a coordinated manner allows the exploration of alternative morphologies and behaviors that are not testable in nature, in order to determine whether the animals are truly optimizing performance and the consequences of alternative character states. Each of these tools has strengths and weaknesses, but when used in combination, each can overcome the limitations of the other, allowing for insights that are both deeper and more broadly applicable across species. This approach thus enables the construction of hypothetical mechanical analogs to fitness landscapes, quantifying the performance consequences of both observed behaviors and hypothetical alternatives in order to visualize tradeoffs and both local and global optima. Considering the advances enabled by this method, we suggest that granular systems and sand-dwelling animals can function as a ‘model system’, much like model taxa, to enable deeper understanding of locomotor behavior and control in challenging environments.

To fully realize the potential of such systems, we must address several challenges in this area. First and foremost are the consequences of disturbance of the media by the animal itself, leaving tracks with which it may interact during subsequent locomotor cycles (Mazouchova et al., 2013; Schiebel et al., 2019preprint), or disturbances from other animals or forces in nature. Although such disturbances are readily observable and are certainly the norm in nature, our ability to model these disturbances is in its infancy (Mazouchova et al., 2013; Schiebel et al., 2019 preprint). Recent work indicates the existence of a predictive model for the impact of material remodeling on the granular reaction forces and thus locomotor performance (Schiebel et al., 2019 preprint). Such a model could be incorporated into a granular-state-dependent

RFT that would elucidate how organisms can mitigate deleterious effects of material disturbances or even take advantage of remodeling to further improve performance (Schiebel et al., 2019 preprint).

Second, the robotic and mathematical models discussed are ‘open loop’ in design, without sensory feedback or behavioral modulation based on the environment. Although this simplification is useful for understanding robust behaviors that maintain performance without feedback, a deeper understanding of animal locomotion must incorporate the feedback and control mechanisms present in real animals. Our approach has been useful to discover control templates (Full and Koditschek, 1999), and we posit that the granular media systems will facilitate the discovery of anchors – models that describe how animal physiology and morphology integrate to produce the template behavior. As this field develops, we look forward to solutions to both of these shortcomings, with the commensurate increased understanding of these fascinating systems. Principles discovered in this tractable, yet complex locomotor substrate may provide insights into more complex substrates, such as heterogeneous and cohesive granular media (Winter et al., 2014; Qian and Goldman, 2015; Dorgan, 2015).

#### Acknowledgements

The views and conclusions contained in this document are those of the authors and should not be interpreted as representing the official policies, either expressed or implied, of the Army Research Laboratory or the US Government. The US Government is authorized to reproduce and distribute reprints for Government purposes notwithstanding any copyright notation herein.

#### Competing interests

The authors declare no competing or financial interests.

#### Funding

This research was supported by National Science Foundation grants 1150760, ECCS-0846750, CMMI 1653220 and 0848894; National Science Foundation funding for the Student Research Network in the Physics of Living Systems grant 1205878; Army Research Office grant W911NF1010343; the Army Research Laboratory under Cooperative Agreement No. W911NF-10-2-0016; the Georgia Institute of Technology School of Biology and Elizabeth Smithgall Watts endowment. D.I.G. acknowledges the Dunn Family Professorship.

#### Supplementary information

Supplementary information available online at <http://jeb.biologists.org/lookup/doi/10.1242/jeb.103564.supplemental>

#### References

- Aguilar, J., Zhang, T., Qian, F., Kingsbury, M., McInroe, B., Mazouchova, N., Li, C., Maladen, R., Gong, C., Travers, M. et al. (2016). A review on locomotion robotics: the study of movement at the intersection of robotics, soft matter and dynamical systems. *Rep. Prog. Phys.* **79**, 110001. doi:10.1088/0034-4885/79/11/110001
- Andreotti, B., Forterre, Y. and Pouliquen, O. (2013). *Granular Media: Between Fluid and Solid*. Cambridge: Cambridge University Press.
- Arnold, E. N. (1995). Identifying the effects of history on adaptation: origins of different sand-diving techniques in lizards. *J. Zool. Lond.* **235**, 351–388. doi:10.1111/j.1469-7998.1995.tb01758.x
- Askari, H. and Kamrin, K. (2016). Intrusion rheology in grains and other flowable materials. *Nat. Mater.* **15**, 1274–1279. doi:10.1038/nmat4727
- Astley, H. C., Gong, C., Dai, J., Travers, M., Serrano, M. M., Vela, P. A., Choset, H., Mendelson, J. R., Jr., Hu, D. L. and Goldman, D. I. (2015). Modulation of orthogonal body waves enables high maneuverability in sidewinding locomotion. *Proc. Natl. Acad. Sci. USA* **112**, 6200–6205. doi:10.1073/pnas.1418965112
- Avron, J. E. and Raz, O. (2008). A geometric theory of swimming: Purcell's swimmer and its symmetrized cousin. *New. J. Phys.* **10**, 063016. doi:10.1088/1367-2630/10/6/063016
- Baum, M. J., Heepe, L. and Gorb, S. N. (2014). Friction behavior of a microstructured polymer surface inspired by snake skin. *Beilstein J. Nanotechnol.* **5**, 83–97. doi:10.3762/bjnano.5.8
- Bittner, B., Hatton, R. L. and Revzen, S. (2018). Geometrically optimal gaits: a data-driven approach. *Nonlinear Dyn.* **94**, 1933–1948. doi:10.1007/s11071-018-4466-9
- Brain, C. K. (1960). Observations on the locomotion of the south west African adder, *Bitis peringueyi* (Boulenger), with speculations on the origin of sidewinding. *Ann. Transvaal Mus.* **24**, 19–24.
- Brzinski, T. A., III and Durian, D. J. (2010). Characterization of the drag force in an air-moderated granular bed. *Soft Mat.* **6**, 3038–3043. doi:10.1039/b926180j
- Cohen, K. E., Hernandez, L. P., Crawford, C. H. and Flammang, B. E. (2018). Channeling vorticity: modeling the filter-feeding mechanism in silver carp using  $\mu$ CT and 3D PIV. *J. Exp. Biol.* **221**, jeb183350. doi:10.1242/jeb.183350
- Collins, S., Ruina, A., Tedrake, R. and Wisse, M. (2005). Efficient bipedal robots based on passive-dynamic walkers. *Science* **307**, 1082–1085. doi:10.1126/science.1107799
- Coulomb, C. A. (1776). Essai sur une application des regles des maximis et minimis a quelques problemes de statique relatifs a l'architecture. *Mem. de l'Acad. R. pres Divers Savants* **7**.
- Ding, Y., Sharpe, S. S., Masse, A. and Goldman, D. I. (2012). Mechanics of undulatory swimming in a frictional fluid. *PLoS Comput. Biol.* **8**, e1002810. doi:10.1371/journal.pcbi.1002810
- Ding, Y., Sharpe, S. S., Wiesenfeld, K. and Goldman, D. I. (2013). Emergence of the advancing neuromechanical phase in a resistive force dominated medium. *Proc. Natl. Acad. Sci. USA* **110**, 10123–10128. doi:10.1073/pnas.1302428110
- Dorgan, K. M. (2015). The biomechanics of burrowing and boring. *J. Exp. Biol.* **218**, 176–183. doi:10.1242/jeb.086983
- Dorgan, K. M., Jumars, P. A., Johnson, B., Boudreau, B. P. and Landis, E. (2005). Burrow extension by crack propagation. *Nature* **433**, 475. doi:10.1038/433475a
- Full, R. J. and Koditschek, D. E. (1999). Templates and anchors: neuromechanical hypotheses of legged locomotion on land. *J. Exp. Biol.* **202**, 3325–3332.
- Gans, C. (1975). Tetrapod limblessness: evolution and functional corollaries. *Am. Zool.* **15**, 455–467. doi:10.1093/icb/15.2.455
- Gans, C. and Kim, H. (1992). Kinematic description of the sidewinding locomotion of four vipers. *Isr. J. Zool.* **38**, 9–23.
- Gans, C. and Mendelsohn, H. (1972). Sidewinding and jumping progression in vipers. In *Proceedings of the 2nd International Symposium, Toxins of Animal and Plant Origin* (ed. A. de Vries and E. Kochva), pp. 17–38. London: Gordon and Breach Science Publishers.
- Gemmill, B. J., Fogerson, S. M., Costello, J. H., Morgan, J. R., Dabiri, J. O. and Colin, S. P. (2016). How the bending kinematics of swimming lampreys build negative pressure fields for suction thrust. *J. Exp. Biol.* **219**, 3884–3895. doi:10.1242/jeb.144642
- Geng, J. and Behringer, R. P. (2005). Slow drag in two-dimensional granular media. *Phys. Rev. E* **71**, 11302. doi:10.1103/PhysRevE.71.011302
- Goldman, D. I. (2014). Colloquium: biophysical principles of undulatory self-propulsion in granular media. *Rev. Mod. Phys.* **86**, 943–958. doi:10.1103/RevModPhys.86.943
- Gong, C., Hatton, R. L. and Choset, H. (2012). Conical sidewinding. In 2012 IEEE International Conference on Robotics and Automation, pp. 4222–4227. IEEE.
- Gong, C., Travers, M. J., Astley, H. C., Li, L., Mendelson, J. R., Goldman, D. I. and Choset, H. (2015). Kinematic gait synthesis for snake robots. *Int. J. Rob. Res.* **35**. doi:10.1177/0278364915593793
- Gong, C., Goldman, D. I. and Choset, H. (2016). Simplifying gait design via shape basis optimization. *Robot. Sci. Syst.* **12**. doi:10.15607/RSS.2016.XII.006
- Gravish, N., Umbanhowar, P. B. and Goldman, D. I. (2010). Force and flow transition in plowed granular media. *Phys. Rev. Lett.* **105**, 128301. doi:10.1103/PhysRevLett.105.128301
- Gray, J. (1946). The mechanism of locomotion in snakes. *J. Exp. Biol.* **23**, 101–120.
- Gray, J. and Hancock, G. J. (1955). The propulsion of sea-urchin spermatozoa. *J. Exp. Biol.* **32**, 802–814.
- Gray, J. and Lissmann, H. W. (1950). The kinetics of locomotion of the grass snake. *J. Exp. Biol.* **94**, 15–42.
- Hatton, R. L. and Choset, H. (2010). Sidewinding on slopes. In 2010 IEEE International Conference on Robotics and Automation, pp. 691–696. IEEE.
- Hatton, R. and Choset, H. (2011). Kinematic cartography for locomotion at low Reynolds numbers. *Proc. Robot. Sci. Syst.* **VII**, 1–8. doi:10.15607/RSS.2011.VII.017
- Hatton, R. L. and Choset, H. (2013). Geometric swimming at low and high Reynolds numbers. *IEEE Trans. Robot.* **29**, 615–624. doi:10.1109/TRO.2013.2251211
- Hatton, R. L. and Choset, H. (2015). Nonconservativity and noncommutativity in locomotion. *Eur. Phys. J. Spec. Top.* **224**, 3141–3174. doi:10.1140/epjst/e2015-50085-y
- Hatton, R. L., Ding, Y., Choset, H. and Goldman, D. I. (2013). Geometric visualization of self-propulsion in a complex medium. *Phys. Rev. Lett.* **110**, 78101. doi:10.1103/PhysRevLett.110.078101
- Holmes, P., Full, R. J., Koditschek, D. and Guckenheimer, J. (2006). The dynamics of legged locomotion: models, analyses, and challenges. *SIAM Rev.* **48**, 207–304. doi:10.1137/S0036144504445133
- Hosoi, A. E. and Goldman, D. I. (2015). Beneath our feet: strategies for locomotion in granular media. *Annu. Rev. Fluid Mech.* **47**, 431–453. doi:10.1146/annurev-fluid-010313-141324
- Hu, D. L., Nirody, J., Scott, T. and Shelley, M. J. (2009). The mechanics of slithering locomotion. *Proc. Natl. Acad. Sci. USA* **106**, 10081–10085. doi:10.1073/pnas.0812533106

- Jayne, B. C. (1986). Kinematics of terrestrial snake locomotion. *Copeia* **1986**, 915-927. doi:10.2307/1445288
- Lauder, G. V. (2010). Swimming hydrodynamics: ten questions and the technical approaches needed to resolve them. In *Animal Locomotion* (ed. G. K. Taylor, M. S. Triantafyllou and C. Tropea), pp. 3-15. Berlin: Springer.
- Li, C., Umbanhowar, P. B., Komsuoglu, H., Koditschek, D. E. and Goldman, D. I. (2009). Sensitive dependence of the motion of a legged robot on granular media. *Proc. Natl. Acad. Sci. USA* **106**, 3029-3034. doi:10.1073/pnas.0809095106
- Li, C., Hsieh, S. T. and Goldman, D. I. (2012). Multi-functional foot use during running in the zebra-tailed lizard (*Callisaurus draconoides*). *J. Exp. Biol.* **215**, 3293-3308. doi:10.1242/jeb.061937
- Li, C., Zhang, T. and Goldman, D. I. (2013). A terradynamics of legged locomotion on granular media. *Science* **339**, 1408-1412. doi:10.1126/science.1229163
- Maladen, R. D., Ding, Y., Li, C. and Goldman, D. I. (2009). Undulatory swimming in sand: subsurface locomotion of the sandfish lizard. *Science* **325**, 314-318. doi:10.1126/science.1172490
- Maladen, R. D., Ding, Y., Umbanhowar, P. B. and Goldman, D. I. (2011a). Undulatory swimming in sand: experimental and simulation studies of a robotic sandfish. *Int. J. Rob. Res.* **30**, 793-805. doi:10.1177/0278364911402406
- Maladen, R. D., Ding, Y., Umbanhowar, P. B., Kamor, A. and Goldman, D. I. (2011b). Mechanical models of sandfish locomotion reveal principles of high performance subsurface sand-swimming. *J. R. Soc. Interface* **8**, 1332-1345. doi:10.1098/rsif.2010.0678
- Marvi, H., Meyers, G., Russell, G. and Hu, D. L. (2011). Scalybot: A Snake-Inspired Robot With Active Control of Friction. In ASME 2011 Dynamic Systems and Control Conference and Bath/ASME Symposium on Fluid Power and Motion Control, Vol. 2, pp. 443-450. ASME.
- Marvi, H., Gong, C., Gravish, N., Astley, H., Travers, M., Hatton, R. L., Mendelson, J. R., Choset, H., Hu, D. L. and Goldman, D. I. (2014). Sidewinding with minimal slip: snake and robot ascent of sandy slopes. *Science* **346**, 224-229. doi:10.1126/science.1255718
- Mazouchova, N., Gravish, N., Savu, A. and Goldman, D. I. (2010). Utilization of granular solidification during terrestrial locomotion of hatchling sea turtles. *Biol. Lett.* **6**, 398-401. doi:10.1098/rsbl.2009.1041
- Mazouchova, N., Umbanhowar, P. B. and Goldman, D. I. (2013). Flipper-driven terrestrial locomotion of a sea turtle-inspired robot. *Bioinspir. Biomim.* **8**, 26007. doi:10.1088/1748-3182/8/2/026007
- McInroe, B., Astley, H. C., Gong, C., Kawano, S. M., Schiebel, P. E., Rieser, J. M., Choset, H., Blob, R. W. and Goldman, D. I. (2016). Tail use improves performance on soft substrates in models of early vertebrate land locomotors. *Science* **353**, 154-158. doi:10.1126/science.aaf0984
- McKee, A., MacDonald, I., Farina, S. C. and Summers, A. P. (2016). Undulation frequency affects burial performance in living and model flatfishes. *Zoology* **119**, 75-80. doi:10.1016/j.zool.2015.12.004
- Melli, J. B., Rowley, C. W. and Rufat, D. S. (2006). Motion planning for an articulated body in a perfect planar fluid. *SIAM J. Appl. Dyn. Syst.* **5**, 650-669. doi:10.1137/060649884
- Morgansen, K. A., Triplett, B. I. and Klein, D. J. (2007). Geometric methods for modeling and control of free-swimming fin-actuated underwater vehicles. *IEEE Trans. Robot.* **23**, 1184-1199. doi:10.1109/LED.2007.911625
- Mosauer, W. (1930). A note on the sidewinding locomotion of snakes. *Am. Nat.* **64**, 179-183. doi:10.1086/280308
- Mosauer, W. (1932). Adaptive convergence in the sand reptiles of the Sahara and of California: a study in structure and behavior. *Copeia* **1932**, 72-78. doi:10.2307/1435888
- Murray, R. M. and Sastry, S. S. (1993). Nonholonomic motion planning: steering using sinusoids. *IEEE Trans. Autom. Contr.* **38**, 700-716. doi:10.1109/9.277235
- Nishikawa, K., Biewener, A. A., Aerts, P., Ahn, A. N., Chiel, H. J., Daley, M. A., Daniel, T. L., Full, R. J., Hale, M. E., Hedrick, T. L. et al. (2007). Neuromechanics: an integrative approach for understanding motor control. *Integr. Comp. Biol.* **47**, 16-54. doi:10.1093/icb/pcm024
- Ostrowski, J. and Burdick, J. (1998). The geometric mechanics of undulatory robotic locomotion. *Int. J. Rob. Res.* **17**, 683-701. doi:10.1177/027836499801700701
- Pope, C. H. (1955). *The Reptile World: A Natural History of the Snakes, Lizards, Turtles, and Crocodilians*. New York: Knopf.
- Purcell, E. M. (1977). Life at low Reynolds number. *Am. J. Phys.* **45**, 3-11. doi:10.1119/1.10903
- Qian, F. and Goldman, D. I. (2015). The dynamics of legged locomotion in heterogeneous terrain: universality in scattering and sensitivity to initial conditions. *Robot. Sci. Syst.* **10**. doi:10.15607/RSS.2015.XI.030
- Qian, F., Zhang, T., Korff, W., Umbanhowar, P. B., Full, R. J. and Goldman, D. I. (2015). Principles of appendage design in robots and animals determining terradynamic performance on flowable ground. *Bioinspir. Biomim.* **10**, 56014. doi:10.1088/1748-3190/10/5/056014
- Ramasamy, S. and Hatton, R. L. (2016). Soap-bubble optimization of gaits. In 2016 IEEE 55th Conference on Decision and Control (CDC), pp. 1056-1062. doi:10.1109/CDC.2016.7798407
- Ramasamy, S. and Hatton, R. L. (2017). Geometric gait optimization beyond two dimensions. In 2017 American Control Conference (ACC), pp. 642-648. doi:10.23919/ACC.2017.7963025
- Ramasamy, S. and Hatton, S. (2019). The geometry of optimal gaits for drag-dominated kinematic systems. *IEEE Trans Robot.* **35**, 1014-1033.
- Remaley, J. L. (2018). Improving understanding of geometric swimmer locomotion. *PhD thesis*, Oregon State University. [https://ir.library.oregonstate.edu/concern/graduate\\_thesis\\_or\\_dissertations/m900p088t](https://ir.library.oregonstate.edu/concern/graduate_thesis_or_dissertations/m900p088t).
- Rieser, J. M., Gong, C., Astley, H. C., Schiebel, P. E., Hatton, R. L., Choset, H. and Goldman, D. I. (2019). Geometric phase and dimensionality reduction in locomoting living systems. arXiv, 1906.11374 [physics.bio-ph]. <https://arxiv.org/abs/1906.11374>
- Ryerson, W. G. and Horwitz, S. (2014). Eunectes murinus (green Anaconda), behavior/sidewinding. *Herpetol. Rev.* **45**, 337-338.
- Savage, S. B. (1984). The mechanics of rapid granular flows. *Adv. Appl. Mech.* **24**, 289-366. doi:10.1016/S0065-2156(08)70047-4
- Schiebel, P. E., Astley, H. C., Rieser, J. M., Agarwal, S., Hubicki, C., Hubbard, A. M., Cruz, K., Mendelson, J., Kamrin, K. and Goldman, D. I. (2019). Mitigating memory effects during undulatory locomotion on hysteretic materials. *bioRxiv*, 748186.
- Schofield, A. N. and Wroth, P. (1968). *Critical State Soil Mechanics*. McGraw-Hill.
- Shammas, E. A., Choset, H. and Rizzi, A. A. (2007). Geometric motion planning analysis for two classes of underactuated mechanical systems. *Int. J. Rob. Res.* **26**, 1043-1073. doi:10.1177/0278364907082106
- Sharpe, S. S. (2013). Control of burial and subsurface locomotion in particulate substrates. *PhD Thesis*, Georgia Institute of Technology.
- Sharpe, S. S., Ding, Y. and Goldman, D. I. (2013). Environmental interaction influences muscle activation strategy during sand-swimming in the sandfish lizard *Scincus scincus*. *J. Exp. Biol.* **216**, 260-274. doi:10.1242/jeb.070482
- Sharpe, S. S., Koehler, S. A., Kuckuk, R. M., Serrano, M., Vela, P. A., Mendelson, J. and Goldman, D. I. (2015a). Locomotor benefits of being a slender and slick sand-swimmer. *J. Exp. Biol.* **218**, 440-450. doi:10.1242/jeb.108357
- Sharpe, S. S., Kuckuk, R. and Goldman, D. I. (2015b). Controlled preparation of wet granular media reveals limits to lizard burial ability. *Phys. Biol.* **12**, 046009. doi:10.1088/1478-3975/12/4/046009
- Tingle, J. L., Gartner, G. E. A., Jayne, B. C. and Garland, T. (2017). Ecological and phylogenetic variability in the spinalis muscle of snakes. *J. Evol. Biol.* **30**, 2031-2043. doi:10.1111/jeb.13173
- Tobalske, B. W. (2007). Biomechanics of bird flight. *J. Exp. Biol.* **210**, 3135-3146. doi:10.1242/jeb.000273
- Tytell, E. D., Hsu, C.-Y., Williams, T. L., Cohen, A. H. and Fauci, L. J. (2010). Interactions between internal forces, body stiffness, and fluid environment in a neuromechanical model of lamprey swimming. *Proc. Natl. Acad. Sci USA* **107**, 19832-19837. doi:10.1073/pnas.1011564107
- Umetani, Y. and Hirose, S. (1975). Biomechanical study on serpentine locomotion. *Trans. Soc. Instrum. Control Eng.* **11**, 20-24. doi:10.9746/sicet.1965.11.20
- Vogel, S. (1994). *Life in Moving Fluids: The Physical Biology of Flow*. Princeton University Press.
- Waldrop, L. D. and Miller, L. A. (2015). The role of the pericardium in the valveless, tubular heart of the tunicate *Ciona savignyi*. *J. Exp. Biol.* **218**, 2753-2763. doi:10.1242/jeb.116863
- Walsh, G. C. and Sastry, S. S. (1995). On reorienting linked rigid bodies using internal motions. *IEEE Trans. Robot. Autom.* **11**, 139-146. doi:10.1109/70.345946
- Whiting, A. S., Bauer, A. M. and Sites, J. W. (2003). Phylogenetic relationships and limb loss in sub-Saharan African scincine lizards (Squamata: Scincidae). *Mol. Phylogenet. Evol.* **29**, 582-598. doi:10.1016/S1055-7903(03)00142-8
- Wiens, J. J., Brandley, M. C. and Reeder, T. W. (2006). Why does a trait evolve multiple times within a clade? repeated evolution of snake-like body form in squamate reptiles. *Evolution* **60**, 123-141. doi:10.1111/j.0014-3820.2006.tb01088.x
- Wilczek, F. and Shapere, A. (1989). *Geometric Phases in Physics*. World Scientific.
- Winter, A. G., V., Deits, R. L. H., Dorsch, D. S., Slocum, A. H. and Hosoi, A. E. (2014). Razor clam to RoboClam: burrowing drag reduction mechanisms and their robotic adaptation. *Bioinspir. Biomim.* **9**, 036009. doi:10.1088/1748-3182/9/3/036009
- Wise, T. N., Schwalbe, M. A. B. and Tytell, E. D. (2018). Hydrodynamics of linear acceleration in bluegill sunfish, *Lepomis macrochirus*. *J. Exp. Biol.* **221**, jeb190892. doi:10.1242/jeb.190892
- Zhang, T., Qian, F., Li, C., Masarati, P., Hoover, A. M., Birkmeyer, P., Pullin, A., Fearing, R. S. and Goldman, D. I. (2013). Ground fluidization promotes rapid running of a lightweight robot. *Int. J. Robot. Res.* **32**, 859-869. doi:10.1177/0278364913481690
